# Supplementary material
Source: publisher site journal article supplement (https://www.dovepress.com/article/393492)
Supplement: Supplementary file 1 [file get_supplementary_file.php]

**Appendix A**

| Construct | Question item | ﻿ References | |
| --- | --- | --- | --- |
| Product-Background Fit (PF) | PF1: The product fits well with the live streaming background. | | Park and Lin  (2020)18 |
| PF2: The pairing of the live streaming background with the product is natural. | |
| PF3: The product is highly appropriate for the live streaming background. | |
| Anchor-Background Fit (AF) | AF1: The anchor fits well with the live streaming background. | | Park and Lin (2020)18 |
| AF2: The pairing of the live streaming background with the anchor is natural. | |
| AF3: The anchor is highly appropriate for the live streaming background. | |
| Perceived Trust  (PT) | PT1: I think that the product information of live streaming shopping is trustworthy. | | Hassanein and Head (2005)83, Babin et al.(2003)84, Park and Lin (2020)18, Wongkitrungrueng and Assarut (2020)39 |
| PT2: I think that the anchor on live streaming shopping is reliable. | |
| PT3: I think that the products I order from live streaming shopping will be as I imagined. | |
| Perceived Value  (PV) | PV1: Live streaming shopping can offer important information about the product. | | Park and Lin (2020)18, Groß (2018)62 |
| PV2: Given the time I need to spend on shopping, participating live streaming shopping is worthwhile to me. | |
| PV3: Live streaming shopping helps me to save money. | |
| PV4: The product that the anchor on live streaming shopping recommends is worth buying. | |
| PV5: The quality of products sold from live streaming shopping is very well. | |
| Perceived Pleasure  (PP) | PP1: Participating live streaming shopping enables me to enjoy the pleasure of shopping. | | Mehrabian and Russell (1974)21, Groß (2018)62, Xu et al. (2020)85 |
| PP2: I experience the emotion of pleasure when I am shopping on live streaming. | |
| PP3: Participating live streaming shopping let me experience the relaxation. | |
| Purchase intention  (PI) | PI1: I have an interest to choose live streaming shopping when buying this kind of product. | | Sun et al.(2019)20,  Hu and Chaudhry (2020)86, Park and Lin(2020)18 |
| PI2: I intend to purchase products or services through live streaming shopping. | |
| PI3: I expect I will purchase products or services through live streaming shopping. | |
